# Supplementary material for: The Effects of Stress on Hippocampal Neurogenesis and Behavior in the Absence of Lipocalin-2
Source: MDPI journal article supplement (doi:10.3390/ijms242115537), 2023-10-24
Supplement: s1 [file s1]

### Supplementary Figure S1

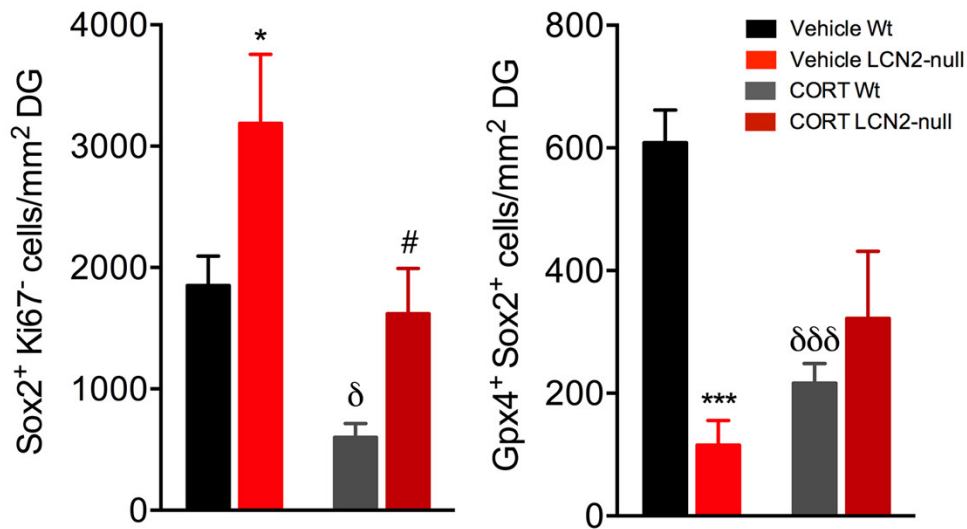

**Figure S1:** Chronic CORT administration reduces type-1 nonradial stem cells. Quantification of nonradial Ki67<sup>-</sup> Sox2<sup>+</sup> type-1 stem cells, after chronic CORT exposure, revealed a significant effect on this population, regardless of the animals' genotype. Data are presented as mean  $\pm$  SEM and were analyzed by two-way ANOVA with Bonferroni's multiple comparison test. \*Denotes differences between vehicle Wt and LCN2-null mice; <sup>δ</sup>between vehicle and CORT Wt; #between vehicle and CORT LCN2-null mice. \*,#,<sup>δ</sup> $p \leq 0.05$ . \*\*\*, <sup>δδδ</sup> $p \leq 0.001$ .
